# Supplementary material for: Supramolecular interactions between hexabromoethane and cyclopentadienyl ruthenium bromides: Halogen bonding or electrostatic organisation?
Source: Royal Society of Chemistry journal article supplement (doi:10.1039/c1ce05438d), 2011-12-17

## Electronic Supplementary Information: Supramolecular interactions between hexabromoethane and cyclopentadienyl ruthenium bromides: Halogen bonding or electrostatic organisation?

Rebecca O. Fuller, Christopher S. Griffith, George A. Koutsantonis,\* Kim M. Lapere, Brian W. Skelton, Mark A. Spackman, Allan H. White and Duncan A. Wild

### Non-Covalent Interactions Between Hexabromoethane and Cyclopentadienyl Ruthenium Halides

#### A. Theoretical energy calculations and geometries from B3LYP 3-21G(all atoms)

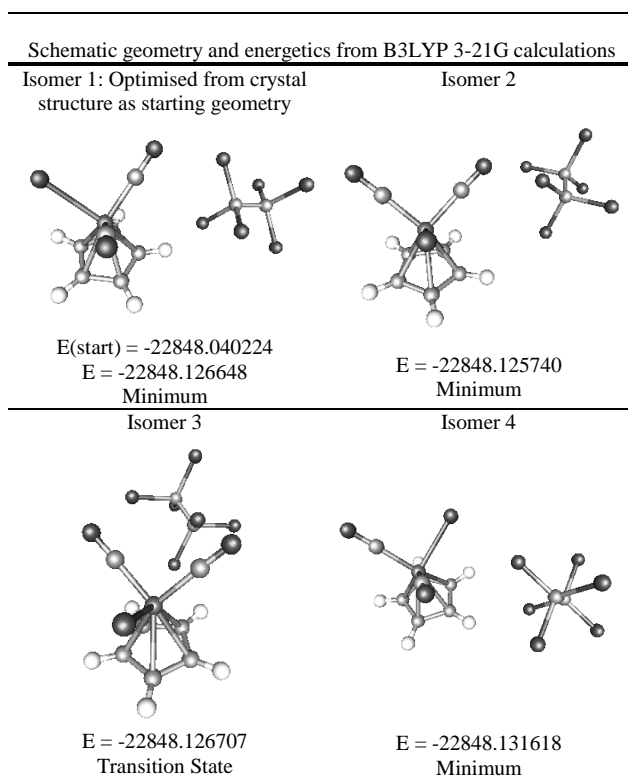

## B. Geometric parameters

All lengths are given in Å and angles in degrees.

### 1) Ru Complex, and C<sub>2</sub>Br<sub>6</sub>

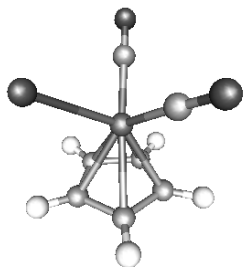

At the B3LYP (LANL2DZ for Ru & Br and I and 6-31G for C, H, F, O & Cl)

|                                                     | F     | Cl    | Br    | I     |               | F     | Cl    | Br    | I     |                 | F     | Cl    | Br    | I     |
|-----------------------------------------------------|-------|-------|-------|-------|---------------|-------|-------|-------|-------|-----------------|-------|-------|-------|-------|
| <b>r(Ru-C)*</b>                                     | 2.353 | 2.346 | 2.346 | 2.374 | <b>r(C-H)</b> | 1.079 | 1.079 | 1.080 | 1.079 | $\angle$        | 123.0 | 123.1 | 123.2 | 120.4 |
|                                                     | 2.335 | 2.319 | 2.320 | 2.324 |               | 1.080 | 1.080 | 1.080 | 1.080 | <b>(Ru-C-H)</b> | 122.1 | 122.0 | 122.0 | 122.0 |
| <b><math>\eta</math>-C<sub>5</sub>H<sub>5</sub></b> | 2.336 | 2.319 | 2.321 | 2.325 |               | 1.080 | 1.080 | 1.080 | 1.080 |                 | 122.4 | 122.2 | 122.1 | 122.1 |
|                                                     | 2.364 | 2.355 | 2.356 | 2.358 |               | 1.079 | 1.079 | 1.079 | 1.079 |                 | 122.7 | 122.8 | 122.8 | 122.7 |
|                                                     | 2.364 | 2.371 | 2.372 | 2.374 |               | 1.079 | 1.080 | 1.079 | 1.079 |                 | 122.7 | 119.4 | 119.9 | 120.4 |
| <b>r(Ru-C(O))**</b>                                 | 1.890 | 1.893 | 1.892 | 1.892 | <b>r(C-O)</b> | 1.171 | 1.170 | 1.171 | 1.171 | $\angle$        | 178.0 | 178.0 | 177.9 | 177.7 |
|                                                     | 1.890 | 1.894 | 1.893 | 1.892 |               | 1.172 | 1.170 | 1.171 | 1.171 | <b>(Ru-C-O)</b> | 176.7 | 177.2 | 177.1 | 176.9 |
| <b>r(Ru-X)</b>                                      | 2.012 | 2.475 | 2.617 | 2.776 |               |       |       |       |       |                 |       |       |       |       |
|                                                     |       |       |       |       |               |       |       |       |       |                 |       |       |       |       |

\* from front right, anti clockwise

\*\* front and then the one to the back

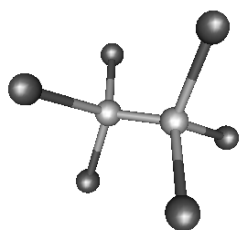

At the B3LYP level with LANL2DZ for Br and 6-31G for C

|                                   |       |             |       |            |       |
|-----------------------------------|-------|-------------|-------|------------|-------|
| <b>C<sub>2</sub>H<sub>6</sub></b> |       |             |       |            |       |
| r(C-C)                            | 1.548 |             |       |            |       |
| r(C-Br) <sup>†</sup>              | 2.040 | ∠ (Br-C-Br) | 107.6 | ∠ (Br-C-C) | 111.3 |
|                                   |       |             |       |            |       |

## 2) Crystal Start Isomer

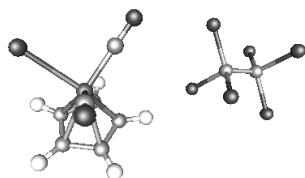

|                                   |       |             |       |            |       |
|-----------------------------------|-------|-------------|-------|------------|-------|
| <b>RuComplex</b>                  |       |             |       |            |       |
| r(Ru-C) <sup>*</sup>              | 2.326 | R(C-H)      | 1.080 | ∠ (Ru-C-H) | 121.9 |
| η-C <sub>5</sub> H <sub>5</sub>   | 2.317 |             | 1.079 |            | 122.5 |
|                                   | 2.352 |             | 1.079 |            | 123.3 |
|                                   | 2.374 |             | 1.079 |            | 120.0 |
|                                   | 2.347 |             | 1.079 |            | 123.3 |
|                                   |       |             |       |            |       |
| r(Ru-C(O)) <sup>**</sup>          | 1.890 | R(C-O)      | 1.171 | ∠ (Ru-C-O) | 177.6 |
|                                   | 1.894 |             | 1.170 |            | 177.9 |
| r(Ru-Br)                          | 2.620 |             |       |            |       |
| <b>C<sub>2</sub>H<sub>6</sub></b> |       |             |       |            |       |
| r(C-C)                            | 1.547 |             |       |            |       |
| r(C-Br) <sup>†</sup>              | 2.035 | ∠ (Br-C-Br) | 107.6 |            |       |
| <i>front</i>                      | 2.045 |             | 107.6 |            |       |
|                                   | 2.045 |             | 107.6 |            |       |
| r(C-Br) <sup>‡</sup>              | 2.038 |             | 107.6 |            |       |
| <i>back</i>                       | 2.042 |             | 107.6 |            |       |
|                                   | 2.039 |             | 107.9 |            |       |
| <b>Intermolec</b>                 |       |             |       |            |       |
| r((C)O-Br)                        | 4.224 |             |       |            |       |
| r(Ru-Br)                          | 6.271 |             |       |            |       |
|                                   |       |             |       |            |       |

\* from front right, anti clockwise

\*\* front and then the one to the back right

† starting with the bromine closest to the CO of the Ru Complex, and moving clockwise

‡ starting with far right Bromine, and moving clockwise

### 3) Isomer 2

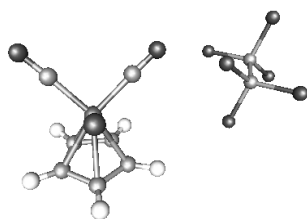

|                                   |       |             |       |            |       |
|-----------------------------------|-------|-------------|-------|------------|-------|
| <b>RuComplex</b>                  |       |             |       |            |       |
| r(Ru-C) <sup>*</sup>              | 2.383 | R(C-H)      | 1.079 | ∠ (Ru-C-H) | 119.8 |
|                                   | 2.358 |             | 1.079 |            | 123.1 |
| η-C <sub>5</sub> H <sub>5</sub>   | 2.323 |             | 1.080 |            | 122.4 |
|                                   | 2.321 |             | 1.080 |            | 122.0 |
|                                   | 2.351 |             | 1.079 |            | 122.9 |
| r(Ru-C(O)) <sup>**</sup>          | 1.890 | R(C-O)      | 1.172 | ∠ (Ru-C-O) | 177.7 |
|                                   | 1.892 |             | 1.170 |            | 177.6 |
| r(Ru-Br)                          | 2.615 |             |       |            |       |
| <b>C<sub>2</sub>H<sub>6</sub></b> |       |             |       |            |       |
| r(C-C)                            | 1.546 |             |       |            |       |
| r(C-Br) <sup>†</sup>              | 2.035 | ∠ (Br-C-Br) | 107.9 |            |       |
| <i>front</i>                      | 2.040 |             | 107.3 |            |       |
|                                   | 2.048 |             | 107.3 |            |       |
| r(C-Br) <sup>‡</sup>              | 2.040 |             | 107.6 |            |       |
| <i>back</i>                       | 2.040 |             | 107.5 |            |       |
|                                   | 2.043 |             | 107.5 |            |       |
| <b>Intermolec</b>                 |       |             |       |            |       |
| r((C)O-Br)                        | 3.254 |             |       |            |       |
| r(Ru-Br)                          | 5.578 |             |       |            |       |
|                                   |       |             |       |            |       |

\* from front right, anti clockwise

\*\* right, then left

† starting with the bromine closest to the CO of the Ru Complex, and moving clockwise

‡ starting with top right bromine, and moving clockwise

#### 4) Isomer 3

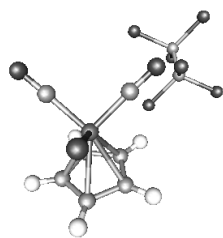

| <b>RuComplex</b>                  |       |             |       |            |       |
|-----------------------------------|-------|-------------|-------|------------|-------|
| r(Ru-C) <sup>*</sup>              | 2.381 | R(C-H)      | 1.080 | ∠ (Ru-C-H) | 120.5 |
|                                   | 2.344 |             | 1.079 |            | 123.1 |
| η-C <sub>5</sub> H <sub>5</sub>   | 2.322 |             | 1.080 |            | 121.0 |
|                                   | 2.311 |             | 1.080 |            | 122.3 |
|                                   | 2.367 |             | 1.079 |            | 123.3 |
| r(Ru-C(O)) <sup>**</sup>          | 1.885 | R(C-O)      | 1.173 | ∠ (Ru-C-O) | 176.6 |
|                                   | 1.895 |             | 1.179 |            | 177.8 |
| r(Ru-Br)                          | 2.618 |             |       |            |       |
| <b>C<sub>2</sub>H<sub>6</sub></b> |       |             |       |            |       |
| r(C-C)                            | 1.546 |             |       |            |       |
| r(C-Br) <sup>†</sup>              | 2.039 | ∠ (Br-C-Br) | 107.8 |            |       |
| <i>front</i>                      | 2.040 |             | 107.3 |            |       |
|                                   | 2.049 |             | 107.7 |            |       |
| r(C-Br) <sup>‡</sup>              | 2.039 |             | 107.8 |            |       |
| <i>back</i>                       | 2.040 |             | 107.6 |            |       |
|                                   | 2.042 |             | 107.6 |            |       |
| <b>Intermolec</b>                 |       |             |       |            |       |
| r((C)O-Br)                        | 3.455 |             |       |            |       |
| r(Ru-Br)                          | 5.170 |             |       |            |       |
|                                   |       |             |       |            |       |

\* from front right, anti clockwise

\*\* right, then left

† starting with the bromine closest to the CO of the Ru Complex, and moving clockwise

‡ starting with top right bromine, and moving clockwise

## 5) Isomer 4

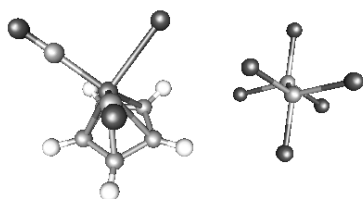

B3LYP LANL2DZ (RU,Br) 6-31G (C,H O)

|                                   |       |             |       |            |       |
|-----------------------------------|-------|-------------|-------|------------|-------|
| <b>RuComplex</b>                  |       |             |       |            |       |
| r(Ru-C) <sup>*</sup>              | 2.317 | R(C-H)      | 1.080 | ∠ (Ru-C-H) | 121.7 |
|                                   | 2.346 |             | 1.079 |            | 123.1 |
| η-C <sub>5</sub> H <sub>5</sub>   | 2.380 |             | 1.079 |            | 120.4 |
|                                   | 2.356 |             | 1.079 |            | 123.6 |
|                                   | 2.307 |             | 1.080 |            | 122.7 |
| r(Ru-C(O)) <sup>**</sup>          | 1.893 | R(C-O)      | 1.170 | ∠ (Ru-C-O) | 177.6 |
|                                   | 1.896 |             | 1.170 |            | 177.5 |
| r(Ru-Br)                          | 2.630 |             |       |            |       |
| <b>C<sub>2</sub>H<sub>6</sub></b> |       |             |       |            |       |
| r(C-C)                            | 1.542 |             |       |            |       |
| r(C-Br) <sup>†</sup>              | 2.053 | ∠ (Br-C-Br) | 108.0 |            |       |
| <i>front</i>                      | 2.040 |             | 107.4 |            |       |
|                                   | 2.050 |             | 107.4 |            |       |
| r(C-Br) <sup>†</sup>              | 2.052 |             | 107.3 |            |       |
| <i>back</i>                       | 2.040 |             | 107.8 |            |       |
|                                   | 2.042 |             | 106.9 |            |       |
| <b>Intermolec</b>                 |       |             |       |            |       |
| r(Br-Br)                          | 3.374 |             |       |            |       |
| r(Ru-Br)                          | 4.625 |             |       |            |       |
|                                   |       |             |       |            |       |

\* starting from the front and moving anti clockwise

\*\* front and then the one to the left

† starting with the bromine closest to the Ru Complex, and moving clockwise

### C. Interactions studies of polymorph monoclinic form

**Fig S1** (a) Ru-Br-(CO)<sub>2</sub>-η-C<sub>5</sub>H<sub>5</sub> surrounded by its nearest neighbours. (b) A Hirshfeld surface mapped onto the central Ru-Br-(CO)<sub>2</sub>-η-C<sub>5</sub>H<sub>5</sub> the red focii around the Br atom indicate distances with contacts are less than the van der Waal radii. (c) A Hirshfeld surface was also mapped onto hexabromoethane. Rotation 180 ° around *b* (c) shows additional short contacts on the Ru-Br-(CO)<sub>2</sub>-η-C<sub>5</sub>H<sub>5</sub> Hirshfeld surface.

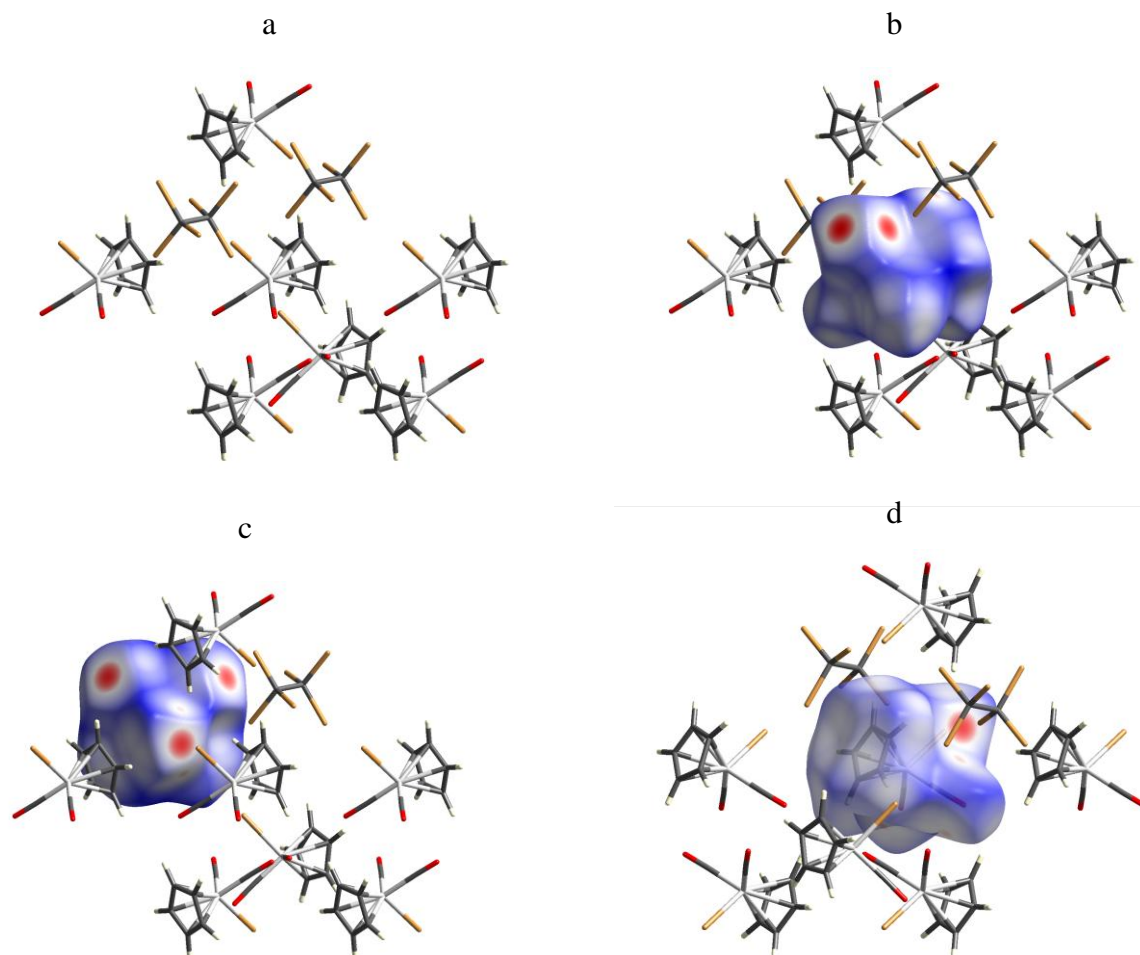

**Fig S2** Fingerprint plot of (a) full Hirshfeld surface in Fig S1b. (b) Br...Br interactions make up 7.1 % and (c) Br...H interactions make up 8.0 % of the total plot.

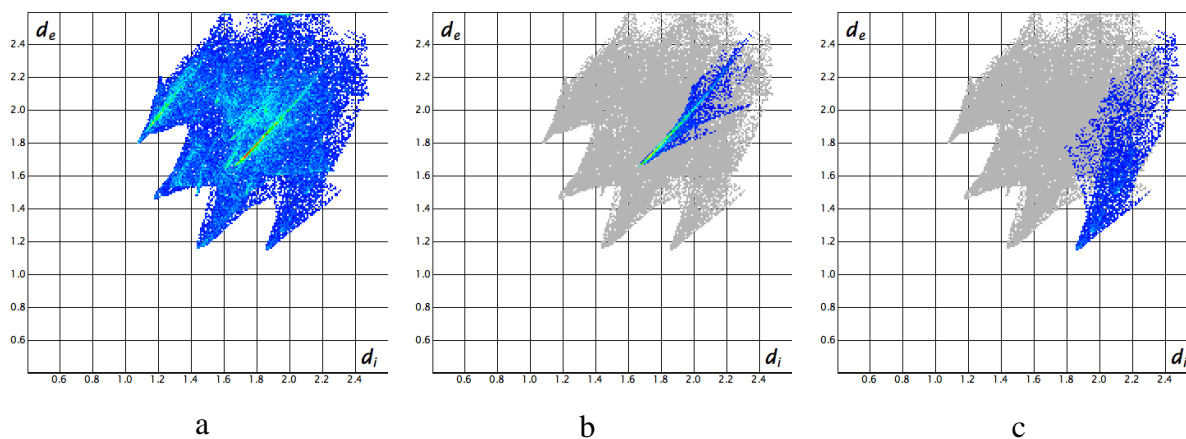

Fig S3 Complimentary electrostatic potentials have been mapped onto molecules of (a) Ru-Br-(CO)<sub>2</sub>-η-C<sub>5</sub>H<sub>5</sub> and (b) hexabromoethane contained in the asymmetric unit cell of monoclinic form. For Ru-Br-(CO)<sub>2</sub>-η-C<sub>5</sub>H<sub>5</sub> the cell is rotated about b by 180°. A strong negative potential is associated with the Br atom on the Ru-Br-(CO)<sub>2</sub>-η-C<sub>5</sub>H<sub>5</sub> molecule. Areas of positive potential are associated with the Br atoms contained in hexabromoethane.

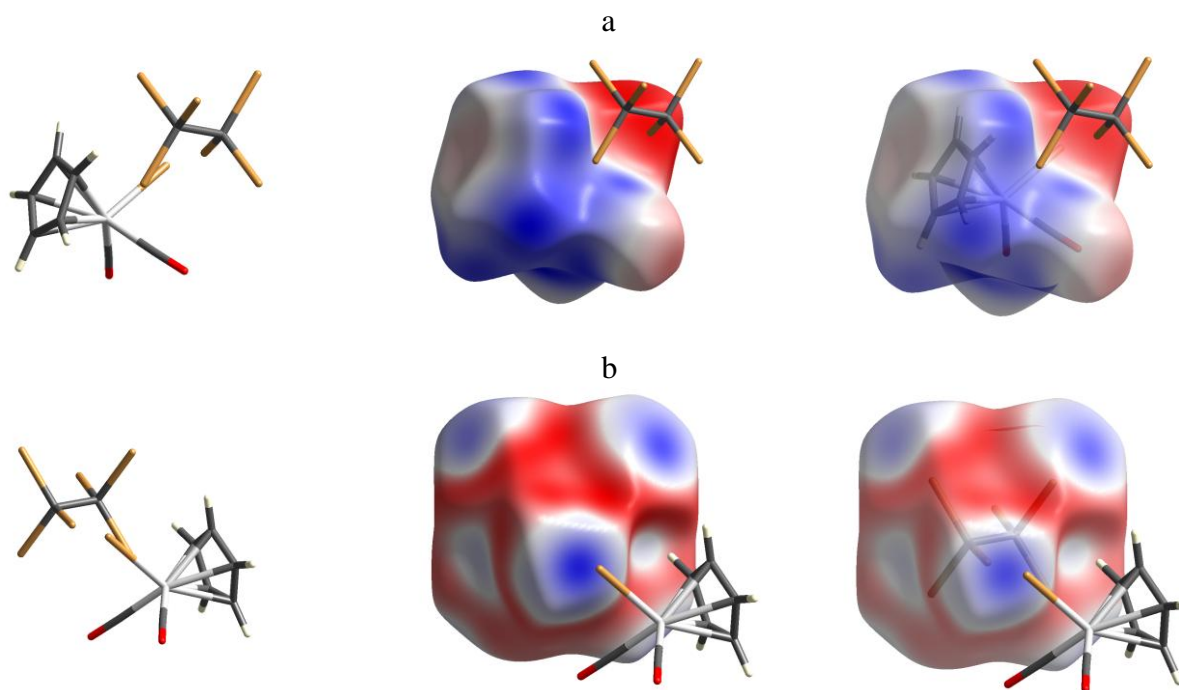

Supplement: c1ce05438d.pdf [file c1ce05438d.pdf]
